# Supplementary material for: The Poisson distribution model fits UMI-based single-cell RNA-sequencing data
Source: PubMed Central journal article supplement (PMC10276395; doi:10.1186/s12859-023-05349-2), 2023-06-17
Supplement: 12859_2023_5349_MOESM1_ESM.pdf [file 12859_2023_5349_MOESM1_ESM.pdf]

Table S1: Summary of p-values from Kolmogorov-Smirnov (KS) test

| Plate              | L  | $\lambda = 0.1$ | $\lambda = 0.5$ | $\lambda = 1$ | $\lambda = 2$ | $\lambda = 5$ | $\lambda = 20$ |
|--------------------|----|-----------------|-----------------|---------------|---------------|---------------|----------------|
| Plate01            | 10 | p = 1           | p = 1           | p = 1         | p = 1         | p = 1         | p = 0.95       |
| Plate03            | 10 | p = 1           | p = 1           | p = 1         | p = 1         | p = 1         | p = 0.8        |
| Plate05A           | 10 | p = 1           | p = 1           | p = 1         | p = 1         | p = 0.95      | p = 0.94       |
| Plate05B           | 10 | p = 1           | p = 1           | p = 1         | p = 1         | p = 1         | p = 0.25       |
| Plate06A           | 10 | p = 1           | p = 1           | p = 1         | p = 1         | p = 0.99      | p = 0.3        |
| Plate08            | 10 | p = 1           | p = 1           | p = 1         | p = 0.69      | p = 1         | p = 0.31       |
| Plate08            | 15 | p = 1           | p = 1           | p = 1         | p = 1         | p = 0.98      | p = 0.47       |
| Plate05A, Plate06A | 10 | p = 1           | p = 0.96        | p = 1         | p = 1         | p = 1         | p = 0.07       |
| Plate05A, Plate06A | 20 | p = 1           | p = 1           | p = 1         | p = 1         | p = 0.94      | p = 0.9        |

\*For large Poisson parameter, relatively fewer matrix entries are aggregated to reduce variation in the underlying parameter.

Table S2: Summary of p-values from Over-Dispersion test

| Plate              | L  | $\lambda = 0.1$ | $\lambda = 0.5$ | $\lambda = 1$ | $\lambda = 2$ | $\lambda = 5$ | $\lambda = 20$ |
|--------------------|----|-----------------|-----------------|---------------|---------------|---------------|----------------|
| Plate01            | 10 | p = 0.963       | p = 1           | p = 0.76      | p = 0.735     | p = 0.194     | p = 0.143      |
| Plate03            | 10 | p = 0.199       | p = 0.988       | p = 0.907     | p = 0.775     | p = 0.381     | p = 0.215      |
| Plate05A           | 10 | p = 0.694       | p = 0.33        | p = 0.77      | p = 0.395     | p = 0.999     | p = 0.22       |
| Plate05B           | 10 | p = 0.467       | p = 0.992       | p = 0.678     | p = 0.186     | p = 0.053     | p = 0.062      |
| Plate06A           | 10 | p = 0.467       | p = 0.741       | p = 0.989     | p = 0.801     | p = 0.152     | p = 0.152      |
| Plate08            | 10 | p = 0.981       | p = 0.345       | p = 0.747     | p = 0.112     | p = 0.147     | p = 0.038      |
| Plate08            | 15 | p = 0.995       | p = 0.918       | p = 1         | p = 0.391     | p = 0.694     | p = 0.164      |
| Plate05A, Plate06A | 10 | p = 0.993       | p = 0.013       | p = 0.37      | p = 0.514     | p = 0.73      | p = 0.026      |
| Plate05A, Plate06A | 20 | p = 0.981       | p = 0.988       | p = 0.859     | p = 0.645     | p = 0.999     | p = 0.177      |

\*For large Poisson parameter, relatively fewer matrix entries are aggregated to reduce variation in the underlying parameter.

Table S3: Summary of p-values from Zero-Inflation test

| Plate              | L  | $\lambda = 0.1$ | $\lambda = 0.5$ | $\lambda = 1$ | $\lambda = 2$ | $\lambda = 5$ | $\lambda = 20$ |
|--------------------|----|-----------------|-----------------|---------------|---------------|---------------|----------------|
| Plate01            | 10 | p = 0.055       | p = 0.4         | p = 0.484     | p = 0.368     | p = 0.126     | p = 0.5        |
| Plate03            | 10 | p = 0.133       | p = 0.887       | p = 0.263     | p = 0.533     | p = 0.126     | p = 0.5        |
| Plate05A           | 10 | p = 0.861       | p = 0.821       | p = 0.314     | p = 0.761     | p = 0.72      | p = 0.5        |
| Plate05B           | 10 | p = 0.446       | p = 0.129       | p = 0.841     | p = 0.614     | p = 0.126     | p = 0.5        |
| Plate06A           | 10 | p = 0.446       | p = 0.345       | p = 0.945     | p = 0.939     | p = 0.126     | p = 0.5        |
| Plate08            | 10 | p = 0.266       | p = 0.292       | p = 0.11      | p = 0.821     | p = 0.126     | p = 0.5        |
| Plate08            | 15 | p = 0.861       | p = 0.982       | p = 1         | p = 0.533     | p = 0.72      | p = 0.5        |
| Plate05A, Plate06A | 10 | p = 0.8         | p = 0.201       | p = 0.711     | p = 0.692     | p = 0.72      | p = 0.5        |
| Plate05A, Plate06A | 20 | p = 0.266       | p = 0.684       | p = 0.426     | p = 0.91      | p = 0.72      | p = 0.5        |

\*For large Poisson parameter, relatively fewer matrix entries are aggregated to reduce variation in the underlying parameter.
