# Supplementary material for: The Poisson distribution model fits UMI-based single-cell RNA-sequencing data
Source: PubMed Central journal article supplement (PMC10276395; doi:10.1186/s12859-023-05349-2), 2023-06-17
Supplement: 12859_2023_5349_MOESM4_ESM.pdf [file 12859_2023_5349_MOESM4_ESM.pdf]

Table S4: Summary of computational time for DIPD

| Data set                                          | Size                      | Computation time |
|---------------------------------------------------|---------------------------|------------------|
| Single clonal cell line data (Plate03)            | 71 cells, 11,227 genes    | 3.2s             |
| Single clonal cell line data (Plate05A, Plate06A) | 129 cells, 12,167 genes   | 6.7s             |
| Three cell lines mixture data                     | 2,609 cells, 21,247 genes | 250.6s           |
| Multiple cell lineages data                       | 1476 cells, 12,822 genes  | 71.2s            |
| PBMC data (Zhengmix8eq)                           | 3994 cells, 15,716 genes  | 284.7s           |

\*The DIPD algorithm was implemented in R Studio version 4.2.1 on a server with 64GB of RAM and an Intel(R) Core(TM) i9 processor.
